# Supplementary material
Source: HighWire-hosted journal article supplement (https://www.ajevonline.org/highwire/filestream/12902/field_highwire_adjunct_files/0/p1_22-012.pdf)
Supplement: p1_22-012.pdf [file p1_22-012.pdf]

**Supplemental Data for:**

Frost SC, Fox DJ, Keller M, Collins TS, and Harbertson JF. 2023. Freeze-killed leaf material causes atypical aromas and astringency in Cabernet Sauvignon. *Am J Enol Vitic* 74:5. DOI: 10.5344/ajev.2022.22012

**Supplemental Table 1** Descriptive analysis mean square error results.

| <b>Factor</b>      | <b>df</b> | <b>Artificial fruit</b> | <b>Astringent</b> | <b>Baking spices</b> | <b>Bitter</b> | <b>Black pepper</b> | <b>Citrus</b> | <b>Cooked veg</b> |
|--------------------|-----------|-------------------------|-------------------|----------------------|---------------|---------------------|---------------|-------------------|
| Judge              | 12        | 6552.3                  | 3904.1            | 4341.9               | 9919.1        | 4475.2              | 5510.2        | 3411.3            |
| Trt                | 3         | 3763.6                  | 5797.7            | 42.5                 | 216.5         | 1678.2              | 1306.8        | 327.2             |
| senRep             | 2         | 559.5                   | 420.2             | 75.9                 | 362.3         | 10.6                | 434.0         | 217.1             |
| Trt(fermRep)       | 8         | 336.6                   | 319.7             | 78.4                 | 345.5         | 154.3               | 130.5         | 93.9              |
| Judge:Trt          | 36        | 849.5                   | 645.2             | 206.3                | 195.1         | 291.4               | 731.9         | 150.1             |
| Judge:senRep       | 24        | 412.2                   | 639.1             | 102.1                | 340.3         | 172.1               | 250.6         | 329.0             |
| Judge:Trt(fermRep) | 96        | 222.9                   | 241.6             | 78.4                 | 211.9         | 155.5               | 121.2         | 88.2              |
| senRep:Trt         | 6         | 128.9                   | 313.5             | 129.3                | 309.8         | 256.4               | 212.5         | 148.4             |
| senRep:Trt:fermRep | 16        | 199.4                   | 245.8             | 125.4                | 183.1         | 245.1               | 143.6         | 78.6              |
| Residuals          | 264       | 292.1                   | 314.5             | 109.6                | 170.8         | 162.1               | 160.4         | 100.4             |

  

|                    | <b>df</b> | <b>Dark fruit</b> | <b>Dried fruit</b> | <b>Floral</b> | <b>Floral aftertaste</b> | <b>Fresh green veg</b> | <b>Herbaceous straw</b> | <b>Hot</b> |
|--------------------|-----------|-------------------|--------------------|---------------|--------------------------|------------------------|-------------------------|------------|
| Judge              | 12        | 12209.1           | 6530.6             | 4261.5        | 5873.9                   | 7031.6                 | 7626.5                  | 10699.6    |
| Trt                | 3         | 3671.1            | 341.5              | 31784.5       | 25683.7                  | 417.7                  | 6808.4                  | 241.2      |
| senRep             | 2         | 471.5             | 442.8              | 266.8         | 205.7                    | 35.5                   | 38.5                    | 32.1       |
| Trt(fermRep)       | 8         | 124.8             | 266.9              | 686.6         | 321.8                    | 122.2                  | 154.8                   | 224.3      |
| Judge:Trt          | 36        | 779.0             | 494.9              | 1087.5        | 1081.5                   | 282.1                  | 1256.3                  | 112.7      |
| Judge:senRep       | 24        | 430.4             | 273.7              | 680.8         | 510.6                    | 138.3                  | 316.6                   | 269.7      |
| Judge:Trt(fermRep) | 96        | 245.5             | 152.3              | 401.9         | 219.1                    | 105.3                  | 203.7                   | 106.1      |
| senRep:Trt         | 6         | 238.0             | 89.1               | 457.5         | 419.0                    | 175.1                  | 122.6                   | 293.6      |
| senRep:Trt:fermRep | 16        | 510.7             | 119.4              | 357.0         | 239.0                    | 172.5                  | 147.0                   | 188.5      |
| Residuals          | 264       | 390.1             | 154.8              | 412.3         | 338.6                    | 145.2                  | 194.3                   | 175.3      |

  

|                    | <b>df</b> | <b>Oxidized</b> | <b>Red fruit</b> | <b>Sour</b> | <b>Stone fruit</b> | <b>Sulfurous</b> | <b>Sweet</b> | <b>Tropical fruit</b> |
|--------------------|-----------|-----------------|------------------|-------------|--------------------|------------------|--------------|-----------------------|
| Judge              | 12        | 2476.8          | 14161.4          | 9004.4      | 5237.2             | 6596.0           | 5684.7       | 4832.7                |
| Trt                | 3         | 90.5            | 488.7            | 266.4       | 2188.5             | 3348.7           | 191.9        | 4696.4                |
| senRep             | 2         | 141.2           | 262.1            | 257.7       | 134.6              | 151.5            | 166.5        | 722.2                 |
| Trt(fermRep)       | 8         | 31.8            | 513.5            | 755.7       | 173.6              | 234.5            | 183.6        | 215.9                 |
| Judge:Trt          | 36        | 73.4            | 679.6            | 306.4       | 654.3              | 482.9            | 383.9        | 893.2                 |
| Judge:senRep       | 24        | 64.3            | 393.7            | 518.1       | 148.1              | 276.6            | 190.1        | 394.4                 |
| Judge:Trt(fermRep) | 96        | 50.9            | 377.6            | 290.6       | 147.9              | 223.1            | 142.9        | 214.0                 |
| senRep:Trt         | 6         | 110.4           | 339.6            | 235.8       | 52.5               | 312.7            | 71.5         | 391.6                 |
| senRep:Trt:fermRep | 16        | 72.1            | 584.9            | 573.0       | 143.4              | 76.2             | 167.6        | 219.8                 |
| Residuals          | 264       | 79.4            | 311.8            | 267.6       | 167.4              | 209.6            | 168.9        | 212.3                 |

**Supplemental Data for:**

Frost SC, Fox DJ, Keller M, Collins TS, and Harbertson JF. 2023. Freeze-killed leaf material causes atypical aromas and astringency in Cabernet Sauvignon. *Am J Enol Vitic* 74:5. DOI: 10.5344/ajev.2022.22012

**Supplemental Table 2** Polyphenolic measures, by fermentation replicate. CE, catechin equivalent; M3G, malvidin-3-glucoside equivalent; AU, absorbance unit.

| Dose (g/kg FLKM) | Fermentation replicate | Tannin (mg/L CE)      | Total phenolics (mg/L CE) | Anthocyanin (mg/L M3G) | Polymeric pigment (AU) |
|------------------|------------------------|-----------------------|---------------------------|------------------------|------------------------|
| 0.00             | 1.00                   | 523 (15) <sup>a</sup> | 1506 (34)                 | 786 (6)                | 6.6 (0.0)              |
| 0.00             | 2.00                   | 490 (7)               | 1460 (6)                  | 874 (13)               | 6.6 (0.1)              |
| 0.00             | 3.00                   | 539 (11)              | 1564 (9)                  | 900 (11)               | 6.2 (0.1)              |
| 0.50             | 1.00                   | 543 (17)              | 1464 (25)                 | 834 (5)                | 7.4 (0.2)              |
| 0.50             | 2.00                   | 536 (13)              | 1460 (50)                 | 876 (11)               | 7.7 (0.2)              |
| 0.50             | 3.00                   | 517 (11)              | 1460 (21)                 | 888 (4)                | 7.4 (0.1)              |
| 2.00             | 1.00                   | 367 (22)              | 1336 (9)                  | 890 (34)               | 7.7 (0.1)              |
| 2.00             | 2.00                   | 290 (3)               | 1236 (54)                 | 919 (9)                | 7.5 (0.2)              |
| 2.00             | 3.00                   | 268 (7)               | 1213 (36)                 | 914 (3)                | 7.3 (0.1)              |
| 8.00             | 1.00                   | 275 (3)               | 1203 (19)                 | 700 (11)               | 6.8 (0.2)              |
| 8.00             | 2.00                   | 313 (11)              | 1235 (32)                 | 799 (19)               | 6.5 (0.1)              |
| 8.00             | 3.00                   | 279 (17)              | 1162 (13)                 | 861 (28)               | 6.6 (0.0)              |

<sup>a</sup>Standard error found in parentheses.

**Supplemental Data for:**

Frost SC, Fox DJ, Keller M, Collins TS, and Harbertson JF. 2023. Freeze-killed leaf material causes atypical aromas and astringency in Cabernet Sauvignon. *Am J Enol Vitic* 74:5. DOI: 10.5344/ajev.2022.22012

---

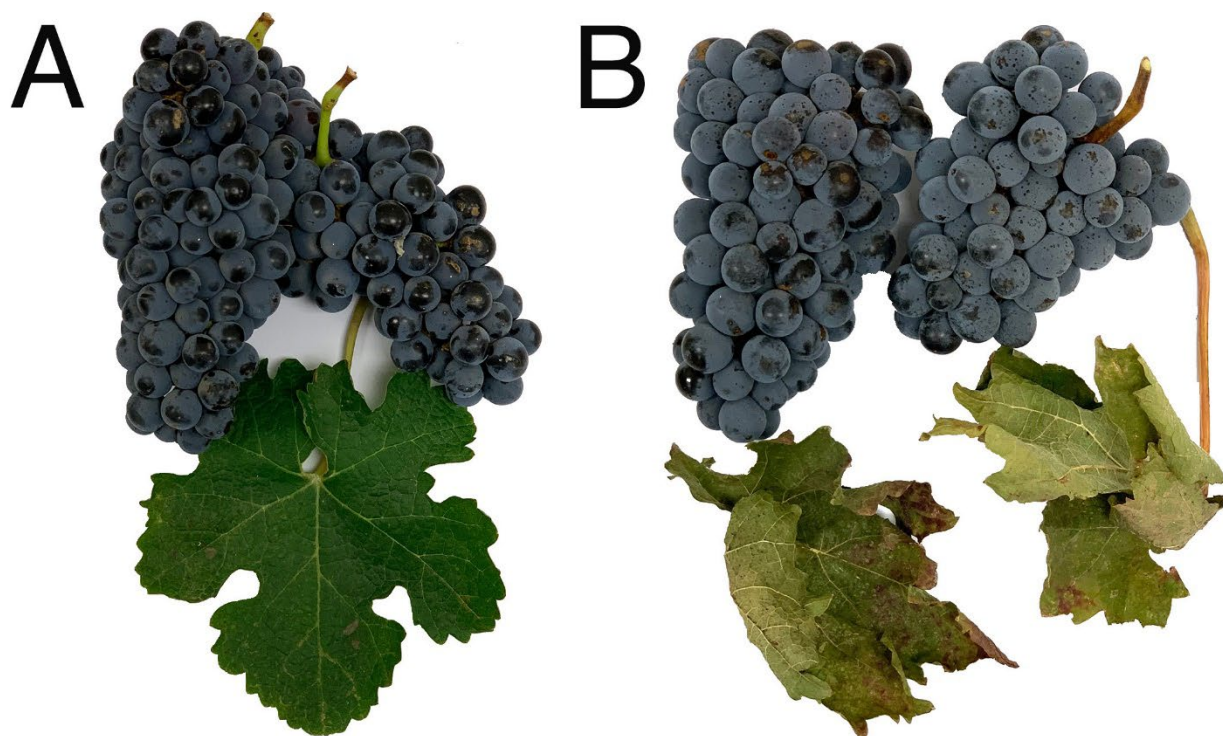

**Supplemental Figure 1** Cabernet Sauvignon clusters and leaves harvested from the same vineyard pre- (A) and post-frost (B) showing healthy and freeze-killed leaves.
